# Supplementary material
Source: ML conference proceedings conference paper supplement (https://openaccess.thecvf.com/content/ICCV2023/html/Li_Unmasked_Teacher_Towards_ICCV_2023_paper.html)
Supplement: Supplementary file 1 [file Li_Unmasked_Teacher_Towards_ICCV_2023_supplemental.zip]

# Unmasked Teacher: Towards Training-Efficient Video Foundation Models

## Supplementary Material

| Stage      | ViT-B                                 | Output Size                               |
|------------|---------------------------------------|-------------------------------------------|
| Data       | sparse sampling                       | $3 \times 8 \times 224 \times 224$        |
| Patch      | $1 \times 16 \times 16$ , 768         | $768 \times 8 \times 196$                 |
| Embedding  | stride $1 \times 16 \times 16$        |                                           |
| Position   | sine-cosine                           | $768 \times 1568$                         |
| Embedding  | $768 \times 1568$                     |                                           |
| Mask       | semantic mask<br>$mask\ ratio = \rho$ | $768 \times 1568 \cdot (1-\rho)$          |
| Encoder    | MHSA(768)<br>MLP(3072) $\times 12$    | $768 \times 1568 \cdot (1-\rho)$          |
| Projection | LN(768)<br>MLP(512) $\times K$        | $K \times 512 \times 1568 \cdot (1-\rho)$ |

Table 17: **Architecture of video encoder.** We take ViT-B with 8-frame input as an example. “MHSA”, “MLP” and “LN” refer to spatiotemporal multi-head self-attention, multi-layer perceptron and layer normalization.  $K$  means the layer number for unmasked token alignment. We mark the **channel number**, **frame number**, **spatial size** and **token number** by different colors.

| config                 | SthSth V2                             | Kinetics         |
|------------------------|---------------------------------------|------------------|
| optimizer              | AdamW [50]                            |                  |
| optimizer momentum     | $\beta_1, \beta_2=0.9, 0.95$          |                  |
| weight decay           | 0.05                                  |                  |
| learning rate schedule | cosine decay [51]                     |                  |
| learning rate          | $1.2e-3$                              |                  |
| batch size             | 2048                                  |                  |
| warmup epochs [29]     | 40                                    |                  |
| total epochs           | default 200                           |                  |
| mask ratio             | default 80%                           |                  |
| input frame            | 8                                     |                  |
| drop path [34]         | 0                                     | 0.1 (B), 0.2 (L) |
| flip augmentation      | no                                    | yes              |
| augmentation           | MultiScaleCrop [0.66, 0.75, 0.875, 1] |                  |

Table 18: **Stage-1 pre-training settings.**

## A. More implementation details

### A.1. Model architecture and training details

In this section, we introduce the model architectures and training hyperparameters in our experiments.

**Stage 1.** In Stage 1, we train the video encoder from scratch, which is a vanilla ViT [23] without temporal down-sampling. We use the same patch size for both ViT-B and ViT-L, *i.e.*,  $1 \times 16 \times 16$  ( $T \times H \times W$ ). To align with the unmasked teacher, we use a simple linear projection, including Layer Normalization [3] and one linear layer. The example architecture is shown in Table 17. For pre-training, we follow most of the hyperparameters in VideoMAE [69], as presented in Table 18. However, to prevent overfitting, we use drop path [34] in our approach.

| config                 | 5M & 17M & 25M                       |
|------------------------|--------------------------------------|
| optimizer              | AdamW [50]                           |
| optimizer momentum     | $\beta_1, \beta_2=0.9, 0.999$        |
| weight decay           | 0.02                                 |
| learning rate schedule | cosine decay [51]                    |
| learning rate          | $1e-4$                               |
| batch size             | 4096 (image), 4096 (video)           |
| warmup epochs [29]     | 1                                    |
| total epochs           | 10                                   |
| mask ratio             | 50% (image), 80% (video), 50% (text) |
| input frame            | 4                                    |
| drop path [34]         | 0.1 (B), 0.2 (L)                     |
| flip augmentation      | yes                                  |
| augmentation           | MultiScaleCrop [0.5, 1]              |

Table 19: **Stage-2 pre-training settings.**

| config                  | SthSth                        | Kinetics               | MiT            |
|-------------------------|-------------------------------|------------------------|----------------|
| optimizer               | AdamW [50]                    |                        |                |
| optimizer momentum      | $\beta_1, \beta_2=0.9, 0.999$ |                        |                |
| weight decay            | 0.05                          |                        |                |
| learning rate schedule  | cosine decay [51]             |                        |                |
| learning rate           | $4e-4$ (B), $8e-4$ (L)        | $4e-4$ (B), $2e-4$ (L) | $1e-4$ (B/L)   |
| batch size              | 512                           |                        |                |
| repeated augmentation   | 2                             | 2                      | 1              |
| warmup epochs [29]      | 5                             | 2                      | 5              |
| total epochs            | 30 (B), 17 (L)                | 35 (B), 20 (L)         | 40 (B), 20 (L) |
| drop path [34]          |                               | 0.1 (B), 0.2 (L)       |                |
| layer-wise lr decay [6] |                               | 0.75 (B), 0.85 (L)     |                |
| flip augmentation       | no                            | yes                    | yes            |
| label smoothing [67]    |                               | 0.1                    |                |
| cutmix [95]             |                               | 1.0                    |                |
| augmentation            |                               | RandAug(9, 0.5) [17]   |                |

Table 20: **Action recognition fine-tuning settings.**

**Stage 2.** In Stage 2, we equip the pre-trained video encoder with a text encoder and cross-modal decoder. Following Singularity [40], for the base model, we use the first 9 layers and the last 3 layers of BERT<sub>base</sub> to initialize the text encoder and decoder, respectively. While for our large model, we respectively adopt the first 19 layers and the 5 layers of BERT<sub>large</sub>. For pre-training, we set all the loss weights to 1. And more details are shown in Table 19.

**Action Recognition.** We adopt the Stage-1 pre-trained video encoder and add an extra classification layer for fine-tuning. Detailed hyperparameters for different datasets are shown in Table 20. In our experiments, we have tried to fine-tune the Stage-2 pre-trained video encoder, but the results on Kinetics are similar.

**Action Detection.** Following VideoMAE [69] and ST-MAE [25], we add ROIALign with MaxPooling to generate the regions of interest. Since we the Kinetics pre-trained models adopt sparse sampling [73], we use a frame span of 300 for action detection, which is the default frame number

| config                  | AVA v2.2                      |
|-------------------------|-------------------------------|
| optimizer               | AdamW [50]                    |
| optimizer momentum      | $\beta_1, \beta_2=0.9, 0.999$ |
| weight decay            | 0.05                          |
| learning rate schedule  | cosine decay [51]             |
| learning rate           | 1.25e-4                       |
| batch size              | 128                           |
| warmup epochs [29]      | 5                             |
| total epochs            | 30 (B), 25 (L)                |
| drop path [34]          | 0.2 (B), 0.4 (L)              |
| layer-wise lr decay [6] | 0.75 (B), 0.85 (L)            |
| flip augmentation       | yes                           |

Table 21: **Action detection fine-tuning settings.**

| config                 | ActivityNet      | MSRVTT                        | MSVD             |
|------------------------|------------------|-------------------------------|------------------|
| optimizer              |                  | AdamW [50]                    |                  |
| optimizer momentum     |                  | $\beta_1, \beta_2=0.9, 0.999$ |                  |
| weight decay           |                  | 0.02                          |                  |
| learning rate schedule |                  | cosine decay [51]             |                  |
| learning rate          | 4e-5 (B/L)       | 2e-5 (B/L)                    | 2e-5 (B)         |
| batch size             |                  | 256                           |                  |
| warmup epochs [29]     |                  | 1                             |                  |
| total epochs           | 12 (B), 10 (L)   | 8 (B/L)                       | 15 (B), 6 (L)    |
| input frame            |                  | 12                            |                  |
| drop path [34]         | 0.2 (B), 0.3 (L) | 0.2 (B), 0.4 (L)              | 0.2 (B), 0.4 (L) |
| flip augmentation      |                  | yes                           |                  |
| augmentation           |                  | MultiScaleCrop [0.5, 1]       |                  |

Table 22: **Video question-answering fine-tuning settings.**

| config                 | MSRVTT-MC                     |
|------------------------|-------------------------------|
| optimizer              | AdamW [50]                    |
| optimizer momentum     | $\beta_1, \beta_2=0.9, 0.999$ |
| weight decay           | 0.02                          |
| learning rate schedule | cosine decay [51]             |
| learning rate          | 8e-5 (B), 4e-5 (L)            |
| batch size             | 256                           |
| warmup epochs [29]     | 0                             |
| total epochs           | 5                             |
| input frame            | 12                            |
| drop path [34]         | 0.2 (B), 0.3 (L)              |
| flip augmentation      | yes                           |
| augmentation           | MultiScaleCrop [0.5, 1]       |

Table 23: **Multi-choice video question-answering fine-tuning settings.**

## B.2. Dataset descriptions

We show the statistics of pre-training datasets in Table 27, and downstream datasets in Table 28.

of Kinetics videos. More details are listed in Table 21.

**Video-text retrieval.** For fine-tuning, we adopt the same architecture as in Stage 2, but we only apply VTC and VTM losses. For all datasets, we sparsely sample 12 frames for both training and testing. More details are listed in Table 24. For a fair comparison, we follow Singularity [40] to apply flip augmentation for SSV2 retrieval, which may harm the performance of this temporal-related dataset.

**Video question-answering.** Following the previous works [40, 15, 43], we formulate this task as text generation instead of classification. We add an extra multi-modal decoder that takes the output of the cross-modal decoder as the keys/values. And it decodes the answer text with “[CLS]” as a start. We follow [40, 15] to adopt the same architecture as the cross-modal decoder, and initialize it using the pre-trained cross-modal decoder. As for multiple-choice question-answering, we follow [40, 43, 15] to convert it to a text-to-video retrieval task, where the question and candidate answers are concatenated. The detailed hyperparameters are shown in Table 22 and Table 23.

## B. More results

### B.1. Video-text retrieval

Table 25 and Table 26 show more zero-shot and fine-tuned retrieval results on MARVTT [83], DiDeMo [1], ActivityNet [38], LSMDC [63] and MSVD [13].

| config                 | MSRVTT           | DiDeMo             | ActivityNet      | LSMDC                         | MSVD             | SSV2-label       | SSV2-template    |
|------------------------|------------------|--------------------|------------------|-------------------------------|------------------|------------------|------------------|
| optimizer              |                  |                    |                  | AdamW [50]                    |                  |                  |                  |
| optimizer momentum     |                  |                    |                  | $\beta_1, \beta_2=0.9, 0.999$ |                  |                  |                  |
| weight decay           |                  |                    |                  | 0.02                          |                  |                  |                  |
| learning rate schedule |                  |                    |                  | cosine decay [51]             |                  |                  |                  |
| learning rate          | 2e-5 (B/L)       | 2e-5 (B), 4e-5 (L) | 4e-5 (B/L)       | 2e-5 (B/L)                    | 2e-5 (B/L)       | 5e-5 (B/L)       | 1e-4 (B/L)       |
| batch size             |                  |                    |                  | 256                           |                  |                  |                  |
| warmup epochs [29]     |                  |                    |                  | 1                             |                  |                  |                  |
| total epochs           | 10 (B), 7(L)     | 12 (B), 5 (L)      | 20 (B/L)         | 10 (B), 8 (L)                 | 10 (B/L)         | 10 (B/L)         | 10 (B), 8 (L)    |
| input frame            |                  |                    |                  | 12                            |                  |                  |                  |
| max text length        | 32               | 64                 | 150              | 96                            | 64               | 25               | 25               |
| drop path [34]         | 0.2 (B), 0.3 (L) | 0.1 (B), 0.3 (L)   | 0.1 (B), 0.2 (L) | 0.1 (B), 0.2 (L)              | 0.2 (B), 0.3 (L) | 0.1 (B), 0.2 (L) | 0.1 (B), 0.2 (L) |
| flip augmentation      |                  |                    |                  | yes                           |                  |                  |                  |
| augmentation           |                  |                    |                  | MultiScaleCrop [0.5, 1]       |                  |                  |                  |

Table 24: Video-text retrieval fine-tuning settings.

| Method | #Pairs | Type | MSRVTT      |             |             | DiDeMo      |             |             | ActivityNet |             |             | LSMDC       |             |             | MSVD        |             |             |
|--------|--------|------|-------------|-------------|-------------|-------------|-------------|-------------|-------------|-------------|-------------|-------------|-------------|-------------|-------------|-------------|-------------|
|        |        |      | R@1         | R@5         | R@10        |
| UMT-B  | 5M     | T2V  | 29.6        | 52.8        | 61.9        | 33.4        | 58.3        | 67.0        | 28.3        | 53.0        | 64.2        | 16.8        | 30.5        | 37.6        | 55.7        | 83.7        | 92.2        |
|        |        | V2T  | 26.2        | 46.7        | 54.9        | 32.0        | 58.7        | 68.2        | 25.9        | 50.2        | 61.7        | 12.9        | 27.4        | 33.6        | 60.6        | 85.7        | 92.2        |
|        | 17M    | T2V  | 35.5        | 59.3        | 68.6        | 41.9        | 66.7        | 75.0        | 33.8        | 59.1        | 70.4        | 18.1        | 33.1        | 40.0        | 58.8        | 86.1        | 91.5        |
|        |        | V2T  | 31.6        | 53.5        | 64.1        | 40.3        | 66.6        | 75.8        | 31.6        | 56.2        | 67.9        | 16.0        | 29.9        | 35.7        | 61.9        | 86.9        | 91.3        |
|        | 25M    | T2V  | 35.2        | 57.8        | 66.0        | 41.2        | 65.4        | 74.9        | 35.5        | 60.6        | 71.8        | 19.1        | 33.4        | 42.2        | 60.3        | 86.7        | 91.9        |
|        |        | V2T  | 30.3        | 50.7        | 61.4        | 40.8        | 67.7        | 76.7        | 32.8        | 57.6        | 69.2        | 15.7        | 30.6        | 37.4        | 64.0        | 86.3        | 90.4        |
| UMT-L  | 5M     | T2V  | 33.3        | 58.1        | 66.7        | 34.0        | 60.4        | 68.7        | 31.9        | 60.2        | 72.0        | 20.0        | 37.2        | 43.7        | 68.1        | 92.1        | 95.2        |
|        |        | V2T  | 30.2        | 51.3        | 61.6        | 36.2        | 60.0        | 68.6        | 30.0        | 59.1        | 71.3        | 16.1        | 32.0        | 39.2        | 68.1        | 92.5        | 96.3        |
|        | 17M    | T2V  | <b>42.6</b> | <b>64.4</b> | <b>73.1</b> | 46.4        | 70.0        | 78.8        | <b>42.8</b> | <b>69.6</b> | 79.8        | <b>25.2</b> | <b>43.0</b> | 50.5        | 71.0        | 93.3        | 96.4        |
|        |        | V2T  | <b>38.6</b> | <b>59.8</b> | <b>69.6</b> | 46.5        | 72.2        | 79.5        | <b>40.7</b> | <b>67.6</b> | <b>78.6</b> | <b>23.2</b> | 37.7        | 44.2        | 69.1        | 91.5        | 94.8        |
|        | 25M    | T2V  | 40.7        | 63.4        | 71.8        | <b>48.6</b> | <b>72.9</b> | <b>79.0</b> | 41.9        | 68.9        | <b>80.3</b> | 24.9        | 41.7        | <b>51.8</b> | <b>72.2</b> | <b>94.2</b> | <b>96.9</b> |
|        |        | V2T  | 37.1        | 58.7        | 68.9        | <b>49.9</b> | <b>74.8</b> | <b>81.4</b> | 39.4        | 66.8        | 78.3        | 21.9        | <b>37.8</b> | <b>45.7</b> | <b>72.4</b> | <b>93.4</b> | <b>95.8</b> |

Table 25: Zero-shot retrieval results on MSRVTT, DiDeMo, ActivityNet, LSMDC, and MSVD.

| Method | #Pairs | Type | MSRVTT      |             |             | DiDeMo      |             |             | ActivityNet |             |             | LSMDC       |             |             | MSVD        |             |             |
|--------|--------|------|-------------|-------------|-------------|-------------|-------------|-------------|-------------|-------------|-------------|-------------|-------------|-------------|-------------|-------------|-------------|
|        |        |      | R@1         | R@5         | R@10        |
| UMT-B  | 5M     | T2V  | 46.3        | 72.7        | 82.0        | 54.8        | 83.0        | 89.0        | 52.1        | 80.5        | 89.6        | 30.3        | 51.8        | 61.4        | 67.0        | 92.7        | 96.7        |
|        |        | V2T  | 44.4        | 72.8        | 80.7        | 52.9        | 80.2        | 85.8        | 50.0        | 79.8        | 88.2        | 29.8        | 52.2        | 60.5        | 67.0        | 92.5        | 96.3        |
|        | 17M    | T2V  | 50.6        | 75.4        | 83.5        | 60.8        | 85.1        | 91.0        | 56.1        | 82.5        | 91.2        | 32.3        | 54.5        | 61.9        | 70.8        | 93.7        | 96.6        |
|        |        | V2T  | 49.4        | 76.7        | 83.5        | 59.5        | 83.8        | 90.7        | 54.6        | 82.1        | 91.1        | 31.5        | 53.6        | 61.9        | 71.3        | 93.9        | 97.2        |
|        | 25M    | T2V  | 51.0        | 76.5        | 84.2        | 61.6        | 86.8        | 91.5        | 58.3        | 83.9        | 91.5        | 32.7        | 54.7        | 63.4        | 71.9        | 94.5        | 97.8        |
|        |        | V2T  | 49.0        | 77.0        | 84.7        | 59.5        | 84.9        | 90.5        | 56.0        | 83.5        | 91.7        | 32.7        | 53.5        | 63.2        | 74.0        | 94.6        | 97.3        |
| UMT-L  | 5M     | T2V  | 53.3        | 76.6        | 83.9        | 59.7        | 84.9        | 90.8        | 58.1        | 85.5        | 92.9        | 37.7        | 60.6        | 67.3        | 76.9        | 96.7        | 98.7        |
|        |        | V2T  | 51.4        | 76.3        | 82.8        | 59.5        | 84.5        | 90.7        | 55.4        | 84.4        | 92.9        | 36.2        | 58.9        | 65.7        | 73.6        | 96.3        | 98.1        |
|        | 17M    | T2V  | 56.5        | 80.1        | 87.4        | 66.6        | 89.9        | 93.7        | 66.6        | 88.6        | 94.7        | 41.4        | 63.8        | 72.3        | 78.8        | 97.3        | 98.8        |
|        |        | V2T  | 56.7        | 79.6        | 86.7        | <b>66.4</b> | 87.5        | 92.9        | 64.3        | 87.8        | <b>94.8</b> | 40.3        | 63.1        | 71.1        | 78.1        | 97.6        | <b>98.7</b> |
|        | 25M    | T2V  | <b>58.8</b> | <b>81.0</b> | <b>87.1</b> | <b>70.4</b> | <b>90.1</b> | <b>93.5</b> | <b>66.8</b> | <b>89.1</b> | <b>94.9</b> | <b>43.0</b> | <b>65.5</b> | <b>73.0</b> | <b>80.3</b> | <b>98.1</b> | <b>99.0</b> |
|        |        | V2T  | <b>58.6</b> | <b>81.6</b> | <b>86.5</b> | 65.7        | <b>89.6</b> | <b>93.3</b> | <b>64.4</b> | <b>89.1</b> | <b>94.8</b> | <b>41.4</b> | <b>64.3</b> | <b>71.5</b> | <b>81.2</b> | <b>96.7</b> | <b>98.7</b> |

Table 26: Fine-tuned retrieval results on MSRVTT, DiDeMo, ActivityNet, LSMDC, and MSVD.

| Dataset                               | #image/video | #text  | Type        |
|---------------------------------------|--------------|--------|-------------|
| Kinetics-710 [44]                     | 658K         | 0      | Video       |
| COCO [48]                             | 113K         | 567K   | image       |
| Visual Genome [39]                    | 100K         | 768K   | image       |
| SBU Captions [57]                     | 860K         | 860K   | image       |
| CC3M [65]                             | 2.88M        | 2.88M  | image       |
| CC12M [12]                            | 11.00M       | 11.00M | image       |
| WebVid-2M [5]                         | 2.49M        | 2.49M  | video       |
| WebVid-10M [5]                        | 10.73M       | 10.73M | video       |
| 5M corpus = CC3M+WebVid-2M            | 5.37M        | 5.37M  | video+image |
| 17M corpus = 5M+COCO+VG+SBU+CC12M     | 17.44M       | 18.57M | video+image |
| 25M corpus = 17M+WebVid-10M−WebVid-2M | 25.68M       | 26.81M | video+image |

Table 27: Statistics of pre-training datasets.

| Dataset                         | #video  |        |       | #text   |        |        | Avg Video  |
|---------------------------------|---------|--------|-------|---------|--------|--------|------------|
|                                 | Train   | Val    | Test  | Train   | Val    | Test   | Length (s) |
| <i>Action Recognition</i>       |         |        |       |         |        |        |            |
| Kinetics-400 [37]               | 240,436 | 19,787 | -     | -       | -      | -      | 10         |
| Kinetics-600 [10]               | 366,006 | 27,935 | -     | -       | -      | -      | 10         |
| Kinetics-700 [11]               | 529,573 | 33,861 | -     | -       | -      | -      | 10         |
| Moments in Time V1 [55]         | 802,244 | 33,899 | -     | -       | -      | -      | 3          |
| Something-Something V2 [30]     | 168,913 | 24,777 | -     | -       | -      | -      | 4          |
| <i>Action Detection</i>         |         |        |       |         |        |        |            |
| AVA v2.2 [31]                   | 235     | 64     | 131   | -       | -      | -      | 900        |
| <i>Video-Text Retrieval</i>     |         |        |       |         |        |        |            |
| MSRVTT [83]                     | 7,010   | -      | 1,000 | 140,200 | -      | 1,000  | 15         |
| DiDeMo [1]                      | 8,496   | 1,094  | 1,036 | 8,496   | 1,094  | 1,036  | 29.3       |
| ActivityNet Captions [38]       | 10,009  | 4,917  | -     | 10,009  | 4,917  | -      | 180        |
| LSMDC [63]                      | 101,055 | -      | 1,000 | 101,055 | -      | 1,000  | 4.7        |
| MSVD [13]                       | 1,200   | 100    | 670   | 1,200   | 100    | 670    | 15         |
| SSV2-Template [40]              | 168,913 | -      | 2,088 | 174     | -      | 174    | 4          |
| SSV2-Label [40]                 | 168,913 | -      | 2,088 | 109,968 | -      | 1,989  | 4          |
| <i>Video Question-Answering</i> |         |        |       |         |        |        |            |
| ActivityNet-QA [93]             | 3,200   | 1,800  | 800   | 32,000  | 18,000 | 8,000  | 180        |
| MSRVTT-QA [81]                  | 6,513   | 497    | 2,990 | 158,581 | 12,278 | 72,821 | 15         |
| MSRVTT-MC [92]                  | 7,010   | -      | 2,990 | 140,200 | -      | 14,950 | 15         |
| MSVD-QA [81]                    | 1,161   | 245    | 504   | 29,883  | 6,415  | 13,157 | 15         |

Table 28: Statistics of downstream datasets.
